## RESEARCH ARTICLE

# Antimicrobial resistance profile of *Pseudomonas aeruginosa* clinical isolates from healthcare-associated infections in Ethiopia: A systematic review and meta-analysis

Zelalem Asmare<sup>1\*</sup>, Melese Abate Reta<sup>1,2</sup>, Yalewayker Gashaw<sup>1</sup>, Ermias Getachew<sup>1</sup>, Assefa Sisay<sup>1</sup>, Muluken Gashaw<sup>1</sup>, Ephrem Tamrat<sup>1</sup>, Atitegeb Abera Kidie<sup>3</sup>, Wagaw Abebe<sup>1</sup>, Tadesse Misganaw<sup>1</sup>, Agenagne Ashagre<sup>1</sup>, Zelalem Dejzmach<sup>1</sup>, Getinet Kumie<sup>1</sup>, Marye Nigatie<sup>1</sup>, Sisay Ayana<sup>1</sup>, Abdu Jemal<sup>1</sup>, Solomon Gedfie<sup>1</sup>, Woldeteklehaymanot Kassahun<sup>1</sup>, Mulat Awoke Kassa<sup>4</sup>, Selamyhun Tadesse<sup>1</sup>, Biruk Beletew Abate<sup>4</sup>

1 Department of Medical Laboratory Science, College of Health Sciences, Woldia University, Woldia, Ethiopia, 2 Department of Medical Microbiology, Faculty of Health Sciences, University of Pretoria, Pretoria, South Africa, 3 Department of Public Health, College of Health Sciences, Woldia University, Woldia, Ethiopia, 4 Department of Nursing, College of Health Sciences, Woldia University, Woldia, Ethiopia

\* [zelalemasmare018@gmail.com](mailto:zelalemasmare018@gmail.com)

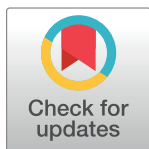

## OPEN ACCESS

**Citation:** Asmare Z, Reta MA, Gashaw Y, Getachew E, Sisay A, Gashaw M, et al. (2024) Antimicrobial resistance profile of *Pseudomonas aeruginosa* clinical isolates from healthcare-associated infections in Ethiopia: A systematic review and meta-analysis. PLoS ONE 19(8): e0308946. <https://doi.org/10.1371/journal.pone.0308946>

**Editor:** Robert P. Smith, Nova Southeastern University, UNITED STATES OF AMERICA

**Received:** March 22, 2024

**Accepted:** July 29, 2024

**Published:** August 13, 2024

**Copyright:** © 2024 Asmare et al. This is an open access article distributed under the terms of the [Creative Commons Attribution License](https://creativecommons.org/licenses/by/4.0/), which permits unrestricted use, distribution, and reproduction in any medium, provided the original author and source are credited.

**Data Availability Statement:** All relevant data are within the manuscript and its [Supporting Information](#) files.

**Funding:** The author(s) received no specific funding for this work.

**Competing interests:** The authors have declared that no competing interests exist.

**Abbreviations:** AMR, Antimicrobial Resistance; HAI, Healthcare-associated Infection; HAUTI,

## Abstract

### Background

Antimicrobial-resistant (AMR) bacterial infection is a significant global threat to the healthcare systems. *Pseudomonas aeruginosa*, the leading infectious agent in the healthcare setting is now one of the major threats due to AMR. A comprehensive understanding of the magnitude of AMR, particularly highly public health important pathogens such as *P. aeruginosa*, is necessary for the management of infections based on local information.

### Objective

This systematic review and meta-analysis aimed to determine the country-wide AMR of *P. aeruginosa*.

### Methods

Systematic searches were performed to retrieve articles from PubMed, Scopus, Web of Science, ScienceDirect electronic databases, Google Scholar search engine, and repository registrars from 2015 to 31<sup>st</sup> December 2023. Twenty-three studies that provided important data on AMR in *P. aeruginosa* were systematically reviewed and analyzed to determine the country-wide magnitude of *P. aeruginosa* AMR profile from healthcare-associated infections. AMR of *P. aeruginosa* to 10 different antibiotics were extracted separately into Microsoft Excel and analyzed using STATA 17.0. Cohen's kappa was computed to determine the agreement between reviewers, the Inverse of variance ( $I^2$ ) was used to evaluate heterogeneity across studies, and Egger's test to identify publication bias. A random effect model

Healthcare-associated Urinary Tract Infection; MDR, Multi-drug Resistance; SSI, Surgical Site Infection.

was used to determine the pooled resistance to each antibiotic. Subgroup analysis was performed by infection type and year of publication.

## Results

This systematic review and meta-analysis revealed that the pooled prevalence of *P. aeruginosa* in clinical specimens associated with HAI was 4.38% (95%CI: 3.00–5.76). The pooled prevalence of AMR in *P. aeruginosa* for different antibiotics varies, ranging from 20.9% (95%CI: 6.2–35.8) for amikacin to 98.72% (95%CI: 96.39–101.4) for ceftriaxone. The pooled resistance was higher for ceftriaxone (98.72%), Trimethoprim-sulfamethoxazole (75.41), and amoxicillin-clavulanic acid (91.2). In contrast relatively lower AMR were observed for amikacin (20.9%) and meropenem (28.64%). The pooled multi-drug resistance (MDR) in *P. aeruginosa* was 80.5% (95%CI: 66.25–93.84). Upon subgroup analysis by infection types and year of publication, *P. aeruginosa* isolated from healthcare-associated infections exhibited higher resistance to ceftazidime (94.72%) compared to isolates from mixed types of healthcare-associated infections (70.84%) and surgical site infections (57.84%). Antimicrobial resistance in gentamicin was higher during the periods of 2018–2020 (73.96%), while comparatively lower during 2021–2023 (42.69%) and 2015–2017 (29.82%)

## Conclusions

Significantly high AMR and MDR were observed from this systematic review and meta-analysis. AMR obtained from this systematic review and meta-analysis urges the need for improved infection control, antimicrobial stewardship practices, and strengthened surveillance systems to control the spread of AMR and ensure effective treatment of *P. aeruginosa* infections.

## Protocol registration

This systematic review and meta-analysis was registered on PROSPERO (Registration ID: [CRD42024518145](https://doi.org/10.1371/journal.pone.0308946)).

## Introduction

Healthcare-associated infections (HAIs) are defined as infections that an individual acquires during medical treatment for other conditions [1]. *Pseudomonas aeruginosa* (*P. aeruginosa*) is a ubiquitous Gram-negative bacterium with simple nutritional requirements that exhibit the ability to thrive in various environments, including water, surfaces, medical devices, and hospital waste products [2]. *P. aeruginosa* is one of the prominent opportunistic pathogens, contributing to HAIs such as pneumonia, bloodstream infections, surgical site infections (SSI), urinary tract infections (UTI), burn wound infections, keratitis, and otitis media [3].

Infectious diseases resulting from antimicrobial-resistant (AMR) bacteria pose a significant global threat to healthcare systems, with an estimated 4.95 million global deaths associated with bacterial AMR in 2019, including 1.27 million deaths directly attributable to bacterial AMR [4]. *P. aeruginosa* was one of the six major bacterial pathogens (*E. coli*, *S. aureus*, *K. pneumoniae*, *S. pneumoniae*, *A. baumannii*, and *P. aeruginosa*) responsible for 18.8% of all deaths

associated with AMR globally [4]. In the World Health Organization (WHO) African region, an estimated 1.05 million deaths were associated with bacterial AMR, from this, 250,000 deaths were directly attributable to bacterial AMR in 2019 [5]. Apart from its impacts on mortality and disability, AMR also incurs substantial economic burdens. According to the estimates by the World Bank, AMR could lead to an extra US\$1 trillion in healthcare expenses by 2050. Additionally, it could cause annual gross domestic product losses ranging from US\$1 trillion to US\$3.4 trillion by 2030 [6].

The misuse and overuse of antimicrobials in diverse sectors drive the rise of AMR pathogens, impacting nations of all income levels, especially worsening conditions in low- and middle-income countries (LMICs) [7]. Factors such as inappropriate antimicrobial use, easy access without prescription, lack of public awareness of proper usage, and inadequate surveillance systems exacerbate the prevalence of infections caused by AMR pathogens, particularly in developing nations [8].

Antimicrobial-resistant *P. aeruginosa* has been identified as a critical priority pathogen by the WHO [9]. *P. aeruginosa* has developed multi-drug resistance (MDR) by modifying outer membrane permeability, utilizing efflux pumps, producing antibiotic-inactivating enzymes, and facilitating the transfer of resistance genes or undergoing mutation, making the treatment of common infectious diseases challenging [10].

Understanding the extent and severity of AMR in *P. aeruginosa* is imperative, given its significance as a prominent opportunistic bacterium causing HAI. Previous studies conducted in Ethiopia have assessed the prevalence of AMR in *P. aeruginosa* against various antibiotics. However, the findings have been inconsistent, with reported resistance rates to different antibiotics ranging from zero [11] to one hundred percent [12–15] across different studies. In Ethiopia, there is a lack of systematic review and meta-analysis on *P. aeruginosa*, a predominant healthcare-associated pathogen. Therefore this systematic review and meta-analysis were undertaken to assess the comprehensive AMR profile of *P. aeruginosa*, which will provide crucial insights for guiding empirical therapy, infection control measures, and antibiotic stewardship efforts in Ethiopian healthcare settings. Furthermore, beyond its local significance, understanding the magnitude of AMR in *P. aeruginosa* will contribute to global health initiatives aimed at combating antimicrobial resistance, particularly against multidrug-resistant pathogens.

## Methods

### Protocol registration

This systematic review and meta-analysis have been registered on PROSPERO (International Prospective Register of Systematic Reviews) (registration ID: CRD42024518145).

### Databases and search strategy

Systematic searches were conducted across various databases, including PubMed, Scopus, Web of Science, and ScienceDirect electronic databases, to retrieve published articles. Additionally, articles available on Google Scholar and online repository sites of different institutions were also retrieved as part of the search process. Appropriate MeSH (Medical Subject Headings) terms and keywords were employed to retrieve relevant articles published in the English language within the timeframe of January 1, 2015, to December 31, 2023, from the listed databases. The search terms were: (((Antimicrobial resistance [MeSH Terms]) OR (Antibiotic resistance [MeSH Terms]) OR (Microbial drug resistance [MeSH Terms])) AND *Pseudomonas aeruginosa* [MeSH Terms] AND (Nosocomial infection) OR (Hospital-acquired infection) OR (Healthcare-associated infection)) AND Ethiopia. The complete search strategy and

searching strings for different databases are depicted in the (S1 Table in S1 File). Furthermore, we reviewed the reference lists of primary studies and review papers to identify grey literature.

## Eligibility criteria

Studies obtained from the aforementioned databases were imported into EndNote X7 reference management software (Thomson Reuters, Toronto, Ontario, Canada), and following the updated Preferred Reporting Items for Systematic Reviews and Meta-Analyses (PRISMA) [16] (Fig 1), duplicates were eliminated, and the remaining studies underwent initial screening by titles, followed by detailed abstract and full-text screening by two reviewers (ZA and EG). To identify eligible articles, we employed predetermined inclusion and exclusion criteria. The inclusion criteria comprised; (a) articles published exclusively in the English language, (b) studies that reported the proportion or percentage of AMR in *P. aeruginosa* utilizing appropriate phenotypic or molecular AMR detection methods, and (c) studies focused solely on HAI or clinical samples. Studies that did not adhere to the aforementioned inclusion criteria were excluded. Moreover, studies that presented combined AMR results in categories such as "Gram-negative bacteria" and "Others," lacked explicit information regarding whether the infection type was hospital-acquired or community-acquired, as well as studies reported both hospital-acquired and community-acquired infections without differentiating the types of

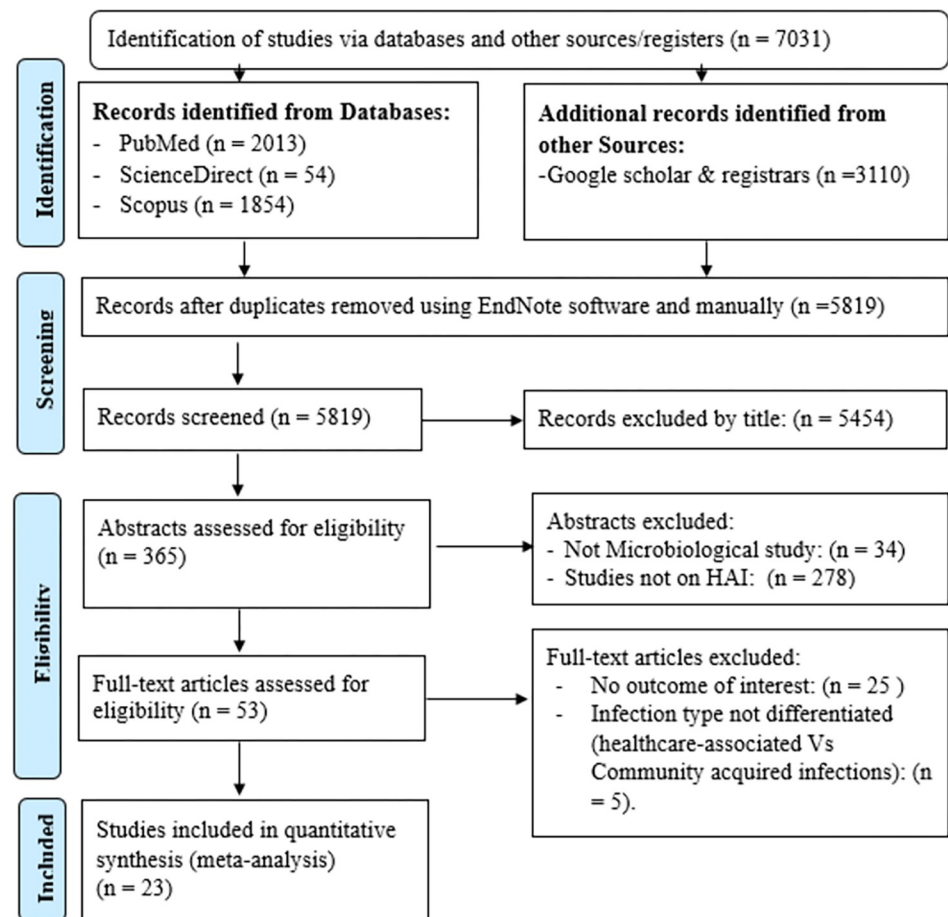

**Fig 1. PRISMA flow diagram to show the result of the search and the reason for exclusion.**

<https://doi.org/10.1371/journal.pone.0308946.g001>

isolates and their respective AMR patterns, studies that didn't report the outcomes of interest were excluded.

### Quality assessments

To assess the quality of each study, we utilized the Joanna Briggs Institute tool designed for prevalence and cohort studies [17]. Two impartial and independent reviewers (ZA and MAR) conducted a critical appraisal of each study. In instances where consensus between the two independent reviewers could not be achieved, a third reviewer (YG) was enlisted to resolve any disagreements and reach on consensus. Studies with a final quality score of 50% or higher were considered for inclusion in the systematic review and meta-analysis (S2 Table in S1 File).

### Data extraction

A standardized data extraction form on Microsoft Excel 2016 was utilized to systematically gather or record relevant information from each included potential study. The extraction process covered various domains, including study characteristics, such as the name of the author (s), publication year, study design, geographic location, types of participants (patients undergo surgery, catheterized patients, all-age patients, pediatric patients, post-partum and post-abortion women) and the number of study participants, clinical data, such as infection type (Healthcare-associated urinary tract infection (HAUTI), SSI, mixed type of HAI, puerperal sepsis) and specimen type (swab/pus, cerebrospinal fluid, blood, urine), the total number of bacteria isolates, and the number of *P. aeruginosa* isolate. It covered details on the AMR profile of *P. aeruginosa* to various antibiotics, including the number of tested isolates, the count of AMR isolates (at least for one antibiotic), and the number of MDR *P. aeruginosa* isolates (Table 1).

### Statistical analysis

The data was initially entered into a prepared Microsoft Excel sheet, and subsequently, it was exported to STATA 17.0 software (StataCorp, Texas, USA) for final analysis. The inverse variance ( $I^2$ ) test was used to assess the heterogeneity across studies with interpretations assigned to  $I^2$  values: 0% (no heterogeneity), 0–25% (low heterogeneity), 25–50% (medium heterogeneity), and >75% (high heterogeneity) [18]. A subgroup analysis based on various categories was performed for studies that exhibited high heterogeneity. The Egger's test was employed to evaluate the presence of publication bias with a significance threshold of  $p < 0.05$ , and a trim-and-fill analysis was conducted to address and manage potential bias. A random effect model for meta-analysis was used to estimate the pooled prevalence of *P. aeruginosa* in clinical specimens associated with HAI, and the pooled prevalence of AMR and MDR *P. aeruginosa*. The aggregate prevalence of HAI associated with *P. aeruginosa* was determined by assessing the proportion of *P. aeruginosa* cases among the total number of specimens. To calculate the pooled prevalence of AMR and MDR continuity correction was made for zero and one-hundred percent AMR values which resulted in zero standard error [19]. Finally, the pooled prevalence of AMR was calculated separately for each antibiotic tested.

## Results

### A descriptive summary of included studies

This systematic review and meta-analysis encompassed 23 studies that provided important data on the microbiologically confirmed prevalence, AMR, and MDR profile of *P. aeruginosa*

**Table 1. Summary of included studies in systematic review and meta-analysis on antimicrobial-resistant *P. aeruginosa* healthcare-associated infections.**

| S. N | Author/s        | Year of publication | Study region | Study design | Sample size | No of total bacterial isolates | No of <i>P. aeruginosa</i> isolates and tested for AMR | No of <i>P. aeruginosa</i> resistance to at least one antibiotic | Reports  |
|------|-----------------|---------------------|--------------|--------------|-------------|--------------------------------|--------------------------------------------------------|------------------------------------------------------------------|----------|
| 1    | Abayneh et al   | 2022                | SNNPR        | CH           | 262         | 41                             | 5                                                      | 4                                                                | AMR      |
| 2    | Abosse et al    | 2021                | AM           | CS           | 165         | 115                            | 26                                                     | 22                                                               | AMR, MDR |
| 3    | Adugna et al    | 2021                | AM           | CS           | 422         | 53                             | 3                                                      | 2                                                                | AMR      |
| 4    | Dagninet et al  | 2022                | SNNPR        | CS           | 245         | 72                             | 10                                                     | 7                                                                | AMR, MDR |
| 5    | Alemayehu et al | 2019                | SNNPR        | CS           | 384         | 47                             | 4                                                      | 4                                                                | AMR, MDR |
| 6    | Ali et al       | 2023                | AM           | CS           | 338         | 48                             | 2                                                      | 2                                                                | AMR, MDR |
| 7    | Asmare et al    | 2023                | AM           | CS           | 211         | 52                             | 6                                                      | 6                                                                | AMR, MDR |
| 8    | Asres et al     | 2017                | AA           | CS           | 197         | 168                            | 9                                                      | 8                                                                | AMR, MDR |
| 9    | Awoke et al     | 2019                | OR           | CS           | 143         | 60                             | 3                                                      | 3                                                                | AMR      |
| 10   | Bekele et al    | 2015                | OR           | CS           | 73          | 36                             | 36                                                     | 0                                                                | AMR      |
| 11   | Bizuayehu et al | 2022                | AA           | CS           | 220         | 79                             | 12                                                     | 10                                                               | AMR, MDR |
| 12   | Dessie et al    | 2016                | AA           | CS           | 107         | 104                            | 6                                                      | 6                                                                | AMR, MDR |
| 13   | Gashaw et al    | 2018                | OR           | CS           | 240         | 126                            | 9                                                      | 9                                                                | AMR, MDR |
| 14   | Gebissa et al   | 2021                | OR           | CS           | 150         | 147                            | 18                                                     | 16                                                               | AMR      |
| 15   | Mekonen et al   | 2021                | AM           | CS           | 254         | 34                             | 18                                                     | 15                                                               | AMR, MDR |
| 16   | Melaku et al    | 2023                | DD           | CS           | 188         | 120                            | 9                                                      | 9                                                                | AMR      |
| 17   | Misha et al     | 2021                | OR           | CH           | 251         | 38                             | 8                                                      | 8                                                                | AMR      |
| 18   | Motbinor et al  | 2020                | AM           | CS           | 238         | 20                             | 11                                                     | 11                                                               | AMR, MDR |
| 19   | Sahile et al    | 2016                | OR           | CS           | 200         | 111                            | 8                                                      | 7                                                                | AMR, MDR |
| 20   | Tilahun et al   | 2022                | AM           | CS           | 384         | 343                            | 31                                                     | 18                                                               | AMR, MDR |
| 21   | Tilahun et al   | 2022                | AM)          | CS           | 423         | 75                             | 46                                                     | 25                                                               | AMR, MDR |
| 22   | Tolera et al    | 2018                | HR           | CS           | 394         | 54                             | 6                                                      | 5                                                                | AMR      |
| 23   | Worku et al     | 2023                | Mixed        | CS           | 752         | 494                            | 18                                                     | 12                                                               | AMR, MDR |

Abbreviation: AM: Amhara; AA: Addis Ababa, OR: Oromia; SNNPR: South Nation and Nationality and Peoples Regions; HR: Harari; DD: Dire Dawa; AMR: Antimicrobial resistance; MDR: Multidrug resistance; CH: cohort; CS: cross-sectional

<https://doi.org/10.1371/journal.pone.0308946.t001>

isolates. In this review, 6,212 study participants suspected of hospital-acquired infections were assessed for bacterial infections, yielding a total of 2,437 hospital-acquired infections. From these studies, 304 isolates of *P. aeruginosa* were obtained and tested for resistance to a maximum of ten different antibiotics. All the studies included followed Clinical Laboratory Standard Institute (CLSI) guidelines to report AMR resistances and considered bacterial isolates as MDR based on the published guideline by Magiorakos, et al. [20]. In these studies, the prevalence of *P. aeruginosa* associated with HAI ranged from 0.59–15.76% [11–15, 21–38] (Table 1).



### The pooled prevalence of *P. aeruginosa* in healthcare-associated infections

In this systematic review and meta-analysis, the pooled prevalence of *P. aeruginosa* associated with HAI was determined to be 4.38% (95%CI: 3.00–5.76) (Fig 2). Since Egger’s test revealed the presence of publication bias ( $P < 0.001$ ), to correct the publication bias, the trim-and-fill analysis was performed, and the pooled prevalence was found to be 4.61% (95%CI: 3.23–6.00)

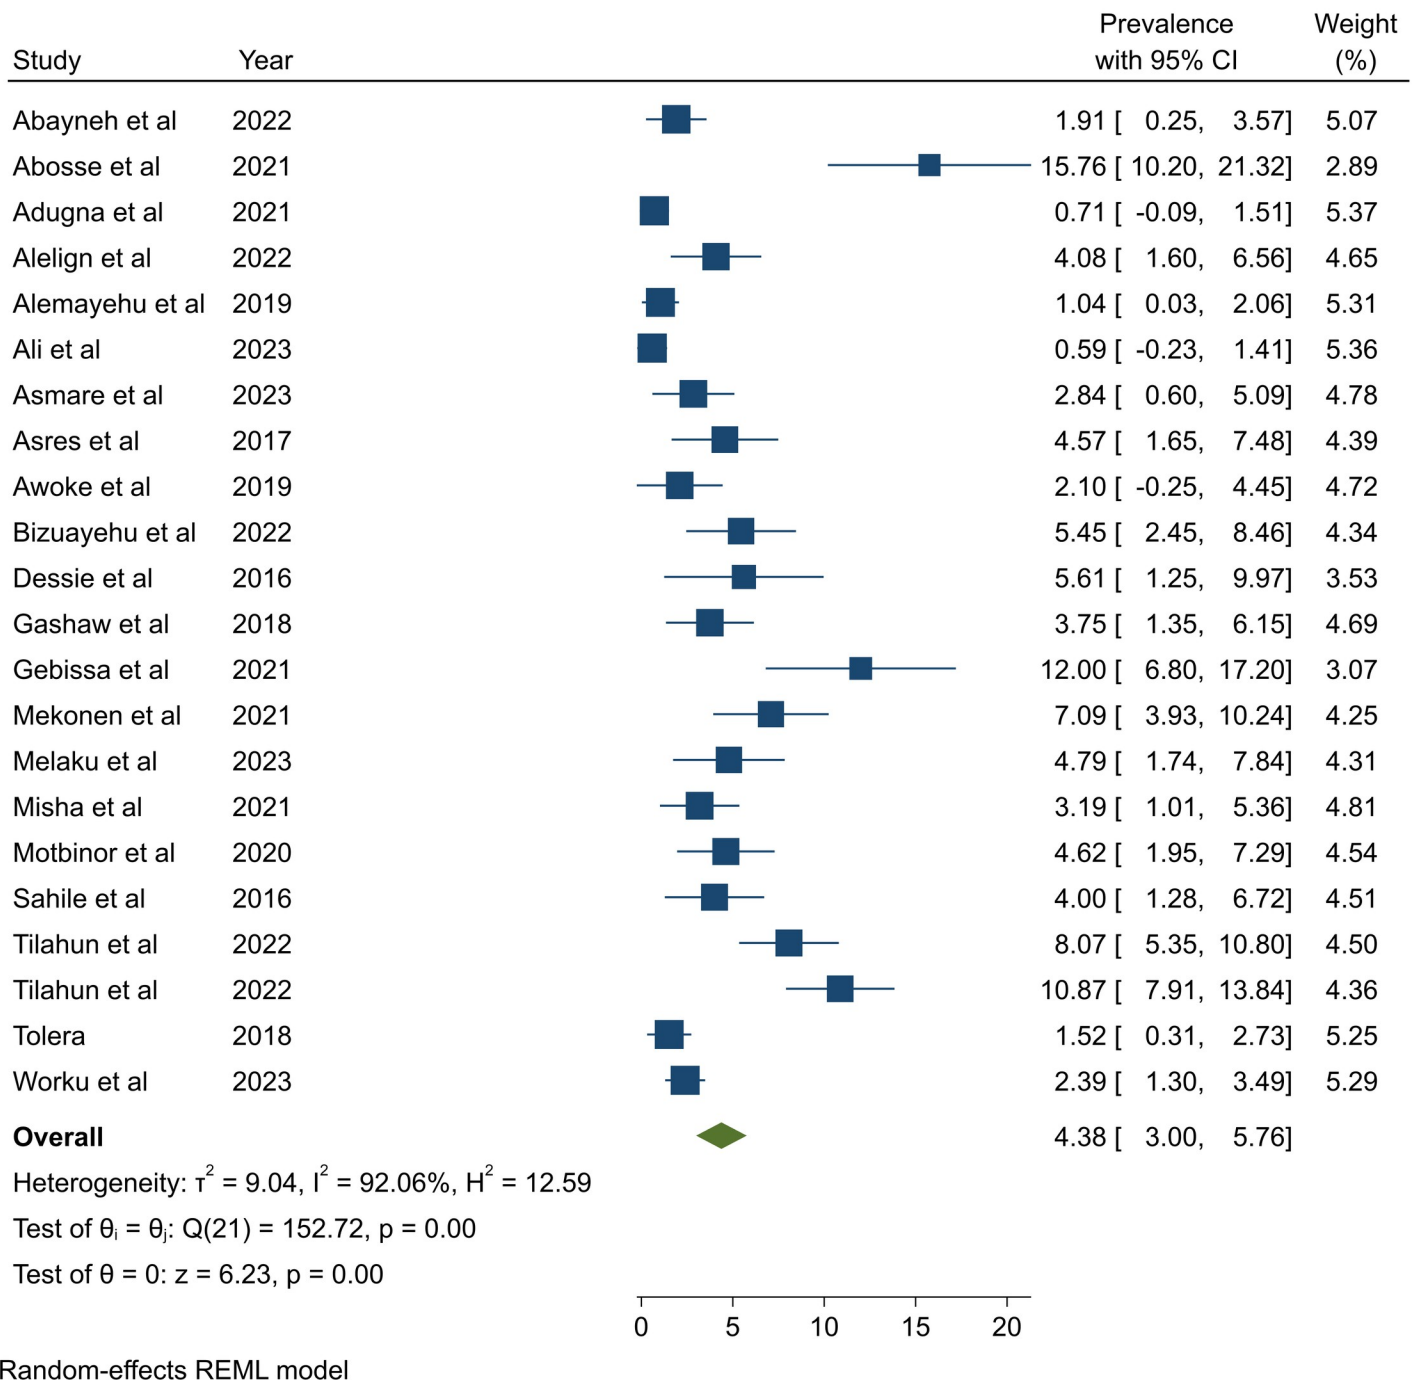

Fig 2. Forest plot showing the prevalence of *P. aeruginosa* associated with healthcare-associated infections.

<https://doi.org/10.1371/journal.pone.0308946.g002>

(S3 Table in S1 File). Even if high heterogeneity ( $I^2 = 92.06$ ) was observed across studies, subgroup analysis by types of infection and year of publication showed no significant variation in the prevalence of *P. aeruginosa* associated HAI (S10 and S11 Figs in S1 File).

**Antimicrobial resistance in *P. aeruginosa*.** The pooled prevalence of AMR in *P. aeruginosa* was calculated based on a maximum of 22 studies for gentamicin [11–15, 21–24, 26, 27, 29–38] and ciprofloxacin [11–15, 21–24, 26, 27, 29–38] and a minimum of 7 studies for trimethoprim-sulfamethoxazole [13–15, 26–28, 33], with a total of 10 antibiotics (amikacin, amoxicillin-clavulanic acid, ampicillin, ceftazidime, ceftriaxone, chloramphenicol, ciprofloxacin, trimethoprim-sulfamethoxazole, gentamicin, and meropenem) being pooled separately (Table 2). The pooled prevalence of AMR in *P. aeruginosa* for the listed antibiotics varies, ranging from 20.9% (95%CI: 6.2–35.8) for amikacin to 98.72% (95%CI: 96.39–101.4) for ceftriaxone (Table 2). From this systematic review and meta-analysis, it was found that the pooled AMR of *P. aeruginosa* to third-generation cephalosporins was higher, ranging from 66.8% for ceftazidime to 98.72% for ceftriaxone. In contrast, relatively lower levels of AMR were observed for amikacin (20.9%) and the last resort antibiotics, carbapenem/meropenem (28.64%) (95%CI: 16.35–40.93) (Fig 3). The Egger's test showed that there was publication bias across studies used to estimate the pooled resistance of meropenem, ceftriaxone, amoxicillin-clavulanic acid, and trimethoprim-sulfamethoxazole (Table 2). To address the publication bias trim-and-fill analysis was computed and resulted in a significant change in AMR of meropenem, ceftriaxone, and trimethoprim-sulfamethoxazole (S4–S6 Tables in S1 File). For amoxicillin-clavulanic acid, there was no effect on the AMR of antibiotics after trim-and-fill analysis.

Inverse of variance ( $I^2$ ) statistics showed greater than 70.0% heterogeneity among studies for all antibiotics except studies pooled to estimate the resistance of ceftriaxone (Table 2). To identify the possible source of heterogeneity, subgroup analysis was performed for each antibiotic by year of publication and type of infection (S12–S27 Figs in S1 File). Subgroup analysis based on study year and infection type revealed noteworthy disparities in the AMR of ceftazidime and gentamicin. Particularly, when examining infection types, it was evident that *P. aeruginosa* isolated from HAUTI exhibited higher resistance to ceftazidime (94.72%) compared to isolates from mixed types of HAI (70.84%) and SSI (57.84%) (S15 Fig in S1 File). Notable fluctuations in gentamicin AMR were observed across different years, with resistance rates being

**Table 2. The pooled prevalence of *Pseudomonas aeruginosa* to ten different antibiotics.**

| Antibiotics                   | No of studies | Pooled resistance (95% CI) | Pooled resistance after trim-and-fill analysis | Heterogeneity ( $I^2$ ) (p-value) | (Egger's test) p-value |
|-------------------------------|---------------|----------------------------|------------------------------------------------|-----------------------------------|------------------------|
| Amikacin                      | 8             | 20.98 (6.2–35.8)           |                                                | 92.17% (<0.01)                    | 0.166                  |
| Amoxicillin-clavulanic acid   | 8**           | 91.2 (80.6–101.8)          | No change                                      | 92.48% (<0.01)                    | <0.001                 |
| Ampicillin                    | 9             | 79.66 (56.6–102.8)         |                                                | 99.07% (<0.01)                    | 0.210                  |
| Ceftazidime                   | 17            | 66.85 (54.6–79.1)          |                                                | 91.04% (<0.01)                    | 0.209                  |
| Ceftriaxone                   | 13 (3*)       | 98.72 (96.39–101.04)       | 99.1 (96.8–101.4)                              | 0.01% (0.13)                      | <0.001                 |
| Chloramphenicol               | 9             | 69.2 (52.8–85.6)           |                                                | 82.52% (<0.01)                    | 0.122                  |
| Ciprofloxacin                 | 22            | 46.5 (35.3–57.7)           |                                                | 90.75% (<0.01)                    | 0.434                  |
| Trimethoprim-Sulfamethoxazole | 11 (4*)       | 75.41 (58.39–92.43)        | 92.1 (72.9–111.3)                              | 70.52% (<0.01)                    | <0.001                 |
| Gentamicin                    | 22            | 47.4 (35.3–59.5)           |                                                | 93.46% (<0.01)                    | 0.317                  |
| Meropenem                     | 14 (2*)       | 28.64 (16.35–40.93)        | 24.1 (11.5–36.7)                               | 90.21% (<0.01)                    | <0.001                 |

\* The number of imputed studies during Trim-and-fill analysis

\*\* No effect on the pooled prevalence after Trim-and-fill analysis; CI: Confidence Interval;  $I^2$ : Inverse of Variance. **Forest plots** of the pooled resistance of *P. aeruginosa* for each antibiotic are available in (S1–S9 Figs in S1 File)

<https://doi.org/10.1371/journal.pone.0308946.t002>



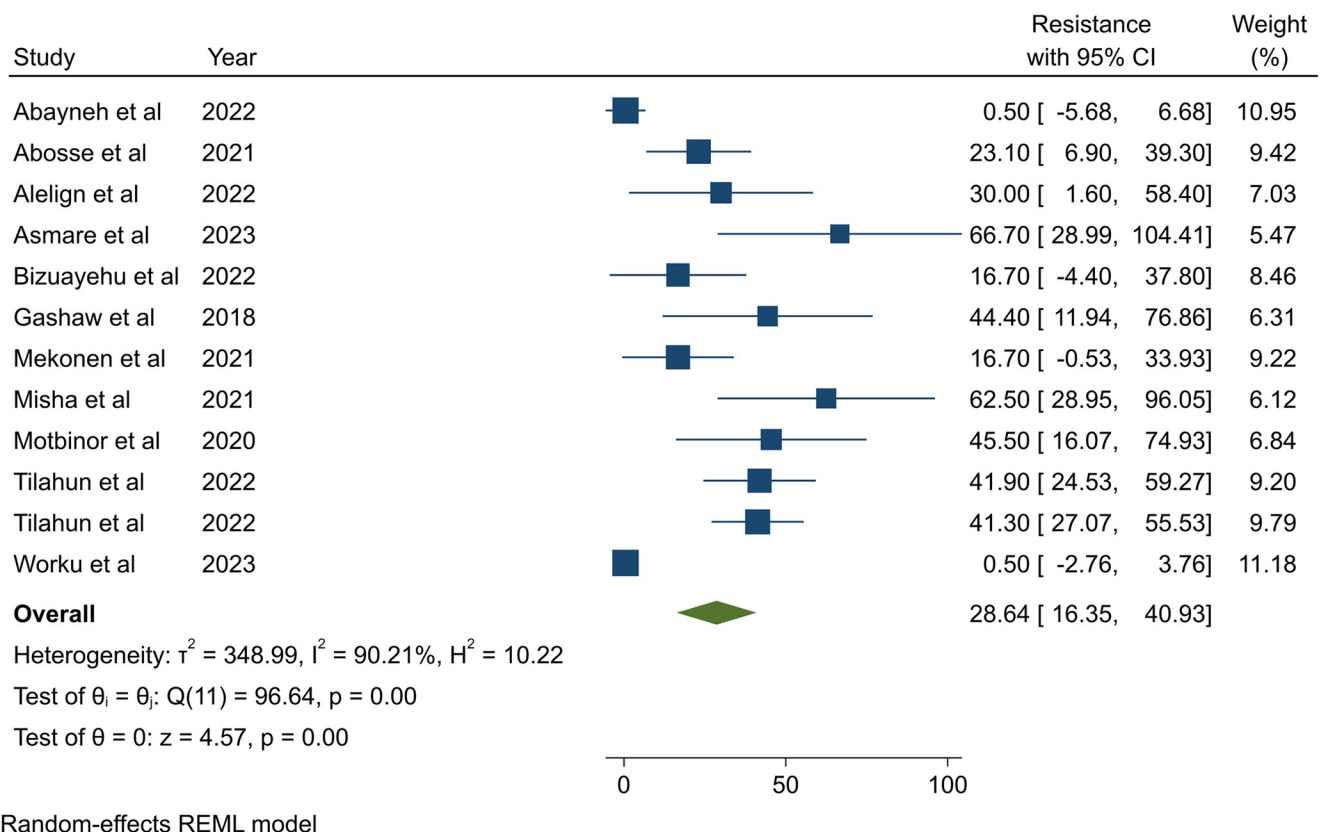

**Fig 3. Pooled antimicrobial resistance of *P. aeruginosa* to meropenem.**

<https://doi.org/10.1371/journal.pone.0308946.g003>

higher during the periods of 2018–2020 (73.96%), while comparatively lower during 2021–2023 (42.69%) and 2015–2017 (29.82%) (S24 Fig in S1 File).

### Multi-drug resistance profile of *P. aeruginosa*

The pooled prevalence of MDR in *P. aeruginosa* was 80.05% (95%CI: 66.25–93.84) (Fig 4). However, Egger's test revealed the presence of publication bias and was subjected to trim-and-fill analysis, and the pooled MDR of *P. aeruginosa* was adjusted to be 78.49% (95%: CI 65.27–91.72) (S7 Table in S1 File and Fig 5). High heterogeneity, indicated by an  $I^2$  value of 97.62%, was noted across studies. Subsequently, subgroup analysis was conducted based on infection types and publication years. The analysis revealed a higher prevalence of MDR cases among mixed types of HAI (95.84%) compared to SSI (73.69%) and HAUTI (63.24%) (Fig 6). However, subgroup analysis based on years of publication did not demonstrate significant variation (S28 Fig in S1 File).

### Discussion

The findings of this systematic review and meta-analysis provide a comprehensive insight into the alarming rates of AMR observed in *P. aeruginosa* isolates from HAIs within Ethiopian healthcare settings. Our analysis reveals a concerning burden, with AMR prevalence ranging from 20.9% to 98.72% across ten different antibiotics analyzed. This wide spectrum of resistance underscores the complexity and severity of the AMR crisis facing healthcare facilities in

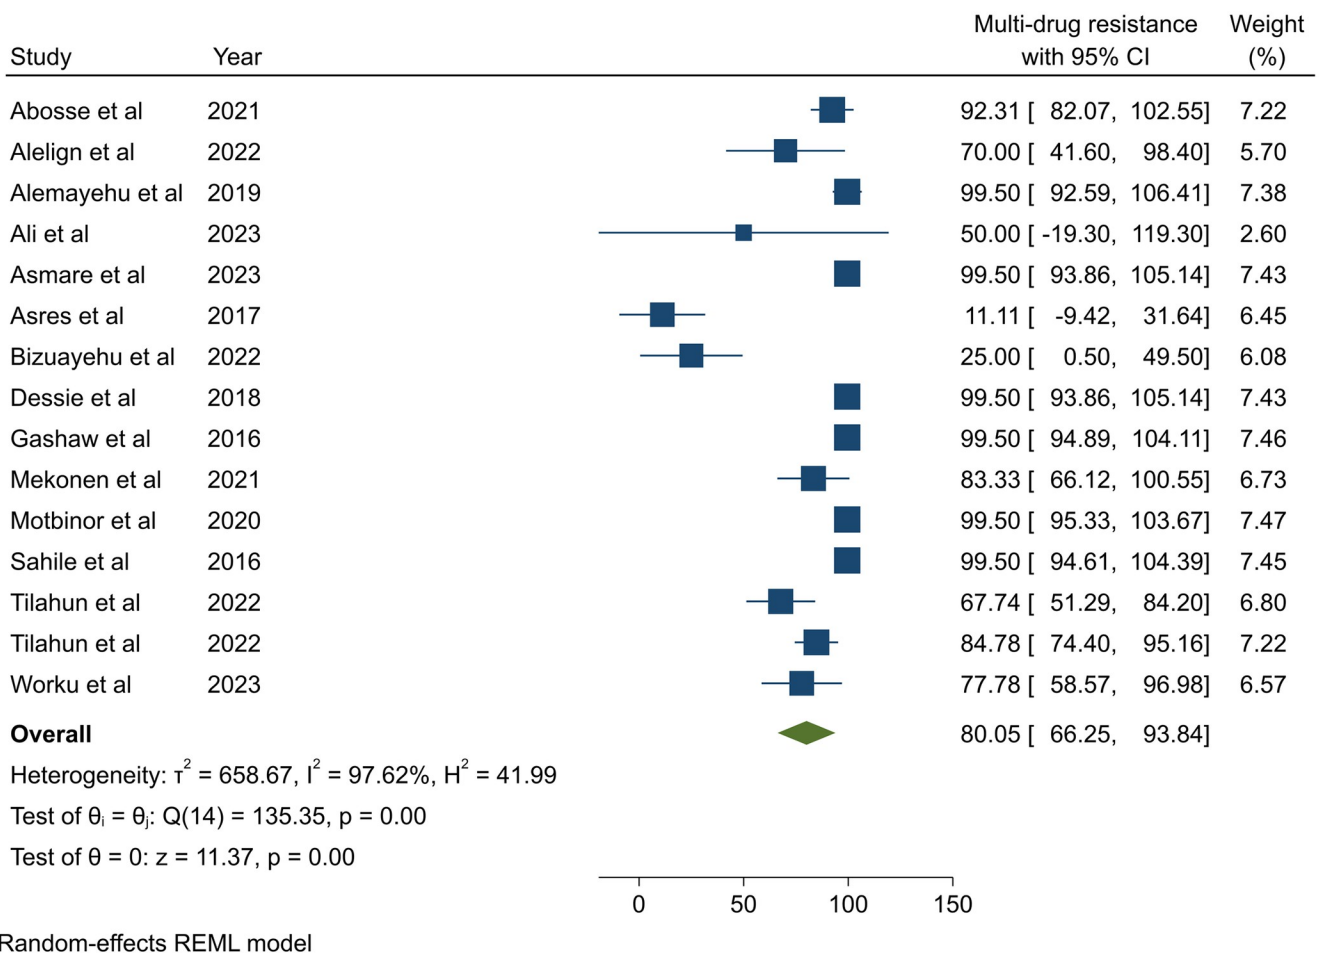

Fig 4. Pooled multi-drug resistance profile of *P. aeruginosa* isolated from healthcare-associated infections.

<https://doi.org/10.1371/journal.pone.0308946.g004>

Ethiopia. Moreover, the high prevalence of MDR *P. aeruginosa* (80.0%), poses a substantial challenge to the effective management and treatment of HAIs. Notably, our findings also indicate that 4.38% of HAIs in Ethiopian hospitals can be attributed to *P. aeruginosa*. These results highlight the urgent need for targeted interventions and strengthened antimicrobial stewardship programs to combat the spread of AMR and mitigate its impact on patient outcomes and healthcare delivery in Ethiopia.

In this thorough systematic review and meta-analysis conducted in Ethiopia, *P. aeruginosa* was identified as responsible for 4.38% of HAIs, a prevalence rate consistent with findings reported from China (6.53%) [39]. However, this prevalence is lower than the reported rate from Egypt (19.9%) [40]. Variations in prevalence rates of *P. aeruginosa* HAIs across regions can be attributed to differences in healthcare practices, antibiotic usage, environmental factors, healthcare infrastructure, and population characteristics.

The AMR pattern of *P. aeruginosa* for aminoglycoside antibiotics reveals varying resistance rates. The amikacin resistance rate of 20.9% in this study aligns with rates in Turkey (17.8%) [41], China (20.8%, 22.2%) [42, 43], and Somalia (20%) [44], while higher rates are seen in India (80%) [45] and Nepal (37.5%) [46]. Additionally, the gentamicin resistance rate of 47.4% in this study is in line with resistance rates in China (42.4%) [43] and Somalia (45.5%) [44],

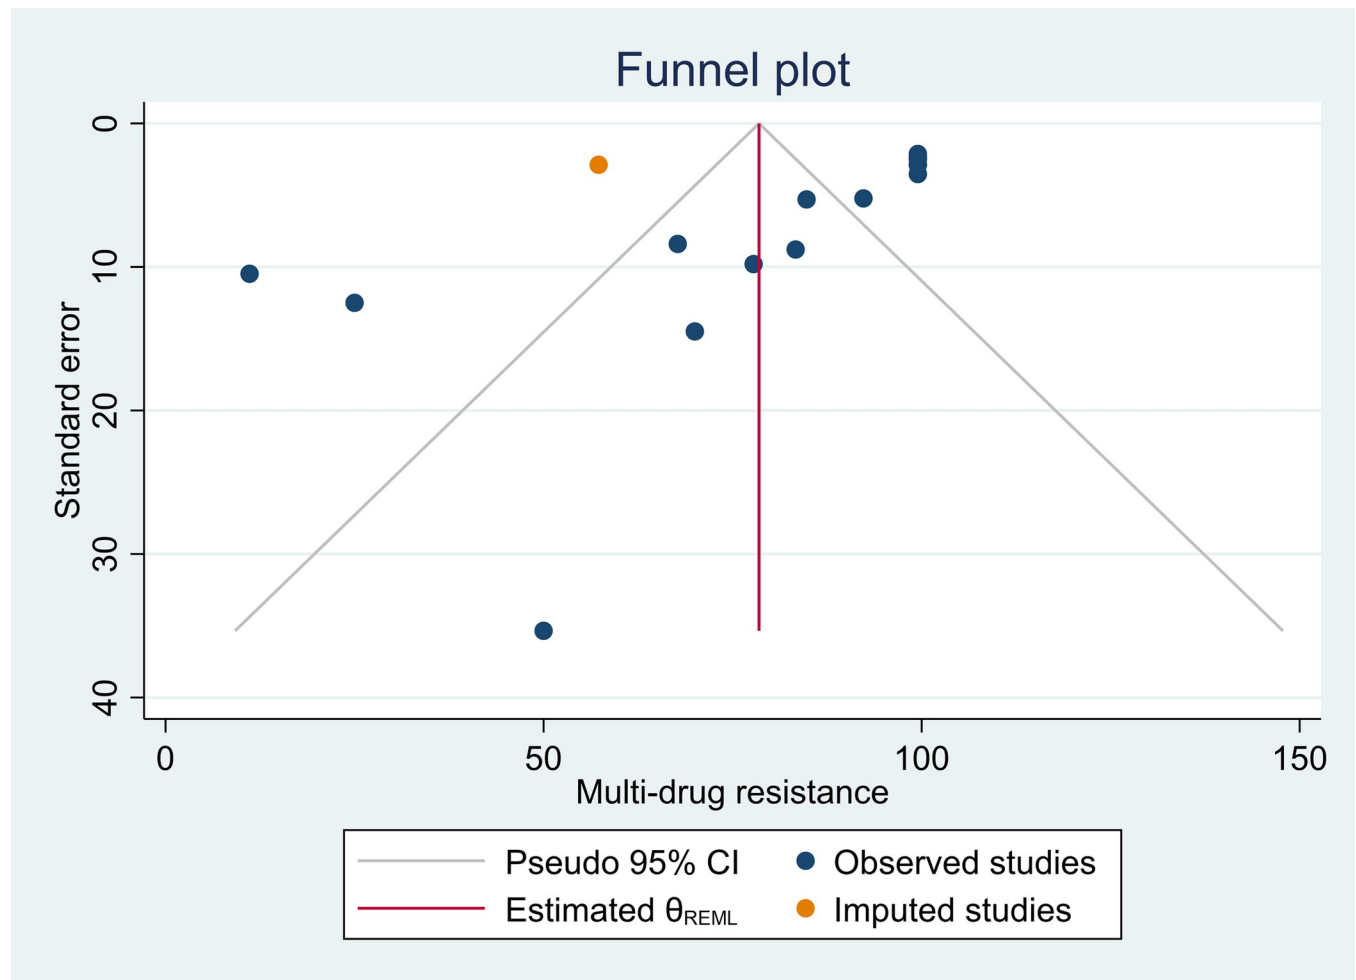

**Fig 5. Funnel plot for multi-drug resistance of *P. aeruginosa* after trim-and-fill analysis.**

<https://doi.org/10.1371/journal.pone.0308946.g005>

but exceeds rates in Turkey (28.2%) [41] and China (29.7%) [42]. Furthermore, lower resistance rates than in India (88%) [45] and Nepal (62.5%) [46] were observed. Factors including overuse of antibiotics, inadequate infection control practices, prolonged hospitalization, and limited surveillance in developing countries might be the possible reasons for this increased magnitude of AMR [47, 48].

*Pseudomonas aeruginosa* showed varying resistance rates to penicillin and cephalosporin antibiotics, which are among the most frequently prescribed antibiotics in Ethiopia. Specifically amoxicillin-clavulanic acid and ceftriaxone exhibited extremely high resistance levels (91.2%) and (98.72%), respectively. The amoxicillin-clavulanic acid resistance rate aligns with a report from Somalia (88.9%) [44] but surpasses rates reported in Iran (50.6%) [49]. Similarly, the ceftriaxone resistance rate exceeds rates reported from China (78.6%) [42]. Additionally, the ceftazidime resistance rate of 66.8%, although consistent with India (70%) [45] and Iran (57.75%) [50], surpasses rates in Turkey (38.6%) [41] and China (34.3%) [43], as well as a report from Somalia (53.8%) [44] and Spain (20.3%) [51]. However, lower ceftazidime resistance rates than in China (94.1%) and Nepal (91.6%) [46].

In this systematic review and meta-analysis, *P. aeruginosa* exhibited a noteworthy 28.64% resistance rate to meropenem, a critical last-resort antibiotic, indicating significant

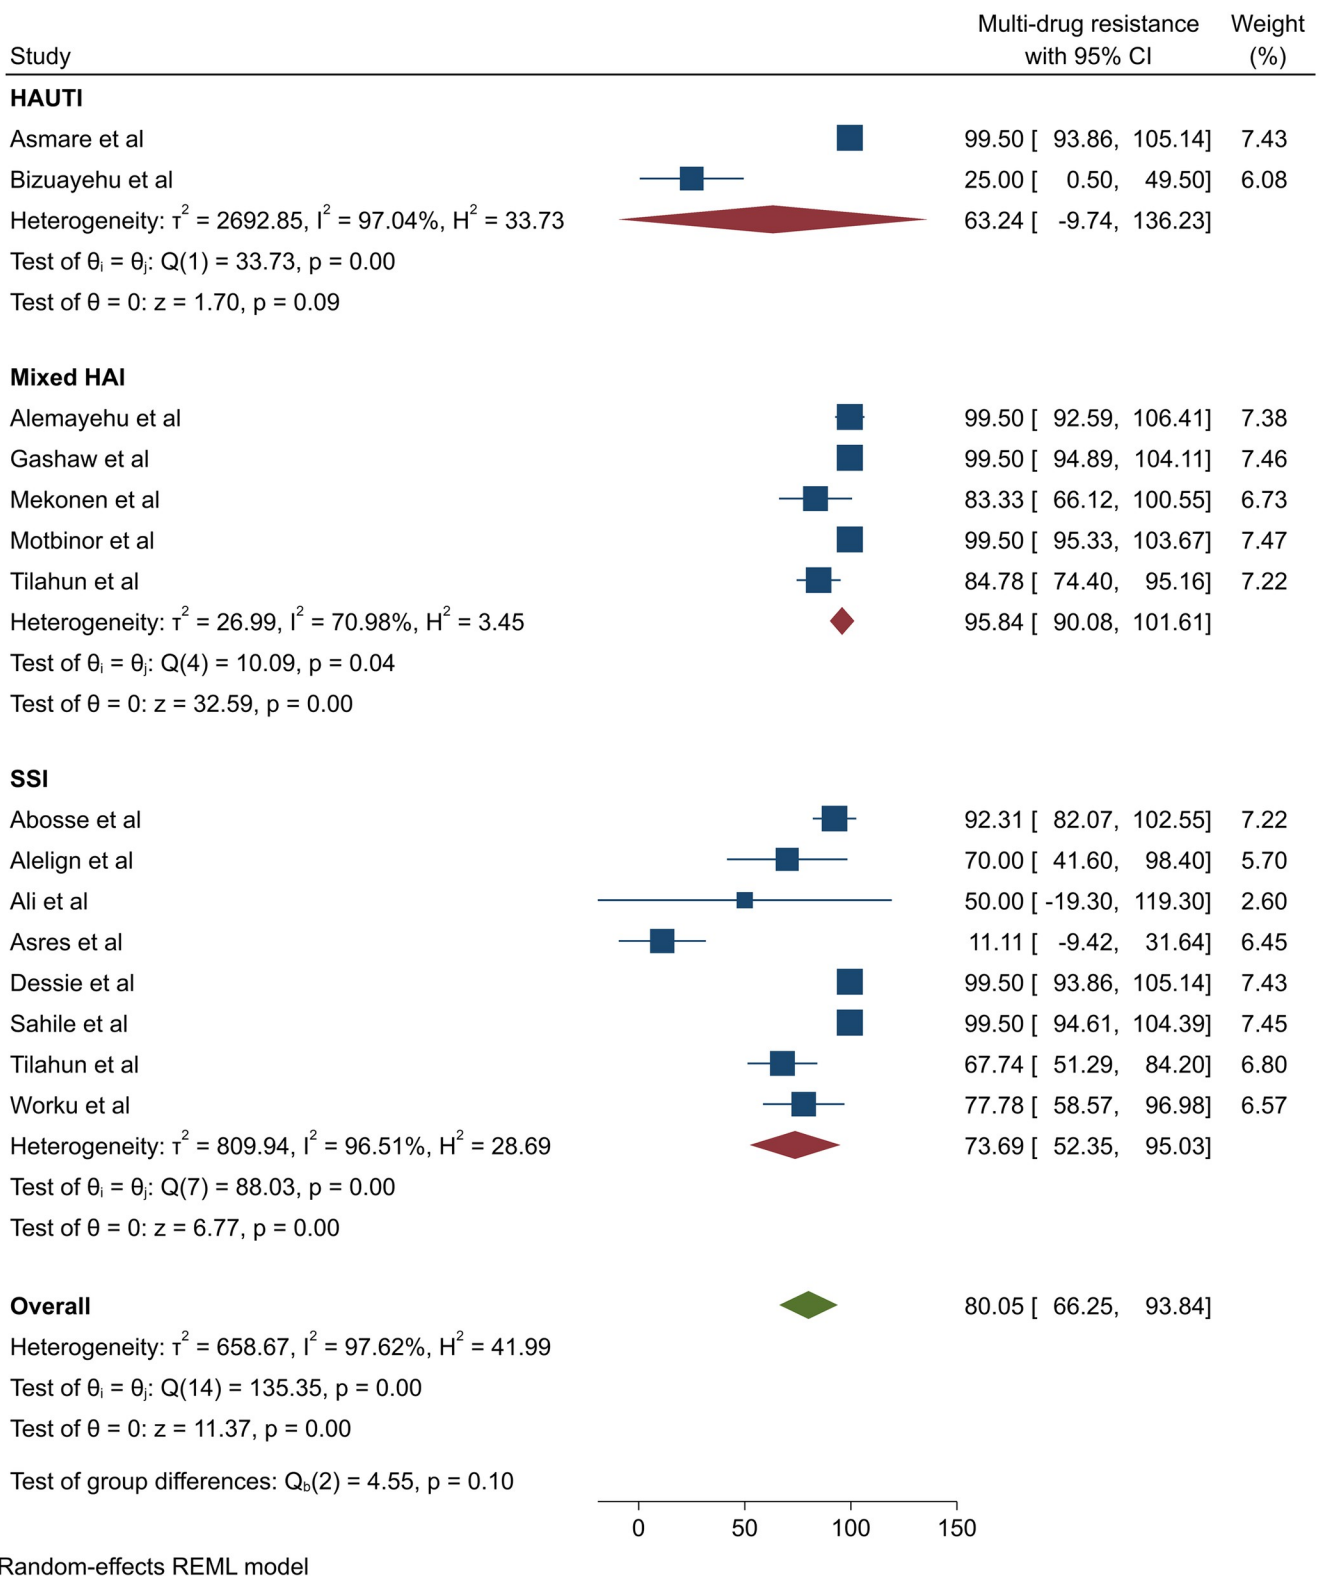

Fig 6. Subgroup analysis of multi-drug resistant *P. aeruginosa* isolated from healthcare-associated infections by infection type.

<https://doi.org/10.1371/journal.pone.0308946.g006>

antimicrobial resistance against carbapenems. This resistance rate is comparable with resistance reported from Turkey (30.1%) [41], China (35.7%) [43], and Spain (14.1%) [51], although it exceeds a lower rate from China (7.7%) [42]. It is notably lower than reported resistance in Iran (40%) [49], Somalia (50%) [44], India (80%) [45], and Nepal (62.5%) [46].

The ciprofloxacin resistance rate of *P. aeruginosa* in this study, at 46.5%, aligns closely with rates reported in Iran (47.3%) [49] and Spain (38.4%) [51]. However, it surpasses rates in Turkey (30.7%) [41] and China (21.2% and 35%) [42, 43], as well as Somalia (14.3%) [44], though remaining lower than in India (96%) [45] and Nepal (95.8%) [46]. On the other hand, the Trimethoprim-Sulfamethoxazole resistance rate of 75.41% in this study indicated alarmingly high levels of resistance requiring immediate attention. This was consistent with the resistance rate in Somalia (89%) [44]. The variability of AMR rates of *P. aeruginosa* observed in our systematic review compared to studies abroad might be attributed to diverse local epidemiological factors, differences in antibiotic usage practices, variations in healthcare settings, and implementation of antibiotic stewardship programs [52, 53].

The MDR profile of *P. aeruginosa* isolated from HAIs in this comprehensive systematic review and meta-analysis was found to be 80.0%. This percentage aligns closely with MDR rates reported from Somalia (68%) [44] and Nepal (83.3%) [46]. However, it surpasses the rate reported from India (50%) [45], Spain (26.2%) [51], and Iran (58%) [49]. The difference in MDR *P. aeruginosa* across countries can be attributed to variations in antibiotic prescribing practices, AMR patterns, healthcare infrastructure, infection control measures, antibiotic stewardship programs, surveillance systems, and population characteristics such as prevalence of comorbidities and immunocompromised individuals.

Overall in this systematic review and meta-analysis, there was a significantly increased AMR in *P. aeruginosa* to different antibiotics which is an indicator of a lack of antimicrobial stewardship programs, surveillance of AMR, and infection prevention and control practices [48]. Clinicians in Ethiopian healthcare settings should reconsider empirical antibiotic therapy for healthcare-associated infections caused by *P. aeruginosa* due to high levels of antimicrobial resistance, necessitating adjustments in treatment protocols to optimize patient outcomes. Urgent implementation of antimicrobial stewardship programs is underscored by the study findings, which can promote judicious antibiotic use, optimize treatment regimens, and mitigate the spread of antimicrobial resistance among *P. aeruginosa* isolates. Strengthening infection control practices, including improved hand hygiene, environmental disinfection, and patient isolation protocols, is crucial to prevent and contain the spread of antimicrobial-resistant *P. aeruginosa* within Ethiopian healthcare settings. Moreover, the study provides valuable data for informing policy decisions aimed at addressing antimicrobial resistance in Ethiopia and facilitating the development of evidence-based strategies for antimicrobial stewardship, infection prevention, surveillance, and resource allocation to combat the growing threat of antimicrobial resistance in healthcare settings.

Future research could focus on investigating novel therapeutic strategies, exploring the molecular mechanisms underlying antimicrobial resistance in *P. aeruginosa*, assessing the impact of local epidemiological factors, evaluating interventions to reduce resistance prevalence, and assessing the impact of socioeconomic factors on antimicrobial resistance dynamics within healthcare settings to improve patient care.

## Strength and limitations

This systematic review and meta-analysis have strengths such as employing a predefined protocol for search strategy and data extraction, alongside internationally recognized tools for critical appraisal to evaluate study quality. However, limitations were observed due to the

inclusion criteria restricting studies solely published in English and selection bias. The included studies varied in quality, methodologies, and outcomes, contributing to heterogeneity in the results, despite our efforts to address this statistically. Publication bias is also a concern, as studies with positive findings are more likely to be published. Errors or inconsistencies in data extraction and analysis, although minimized, cannot be entirely eliminated. Additionally, inconsistencies in reporting specific data points across studies limited some subgroup analyses.

## Conclusion and recommendations

The findings of this systematic review and meta-analysis concerning the AMR profile of *P. aeruginosa* isolated from HAIs in Ethiopia revealed a significant prevalence of MDR, indicating a substantial challenge in managing infections caused by this pathogen in healthcare settings. The observed increase in AMR and MDR underscores the urgent need for enhanced infection control measures, careful antimicrobial stewardship practices, and strengthened surveillance systems to curb the spread of resistant strains and ensure effective treatment of *P. aeruginosa* infections in Ethiopia. Additionally, collaborative efforts at local, national, and international levels are warranted to address the multifaceted factors contributing to AMR and mitigate its impact on public health. Based on the finding from this comprehensive systematic review and meta-analysis we would like to recommend all stakeholders such as governmental, non-governmental organizations, health department officers, policy makers and researchers to work collaboratively to enhance infection prevention control and antimicrobial stewardship practices.

## Supporting information

**S1 Checklist. PRISMA checklist for antimicrobial resistance of *P. aeruginosa* clinical isolates from healthcare-associated infections in Ethiopia.**

(DOCX)

**S1 File. Supporting tables and figures.**

(DOCX)

## Author Contributions

**Conceptualization:** Zelalem Asmare, Melese Abate Reta, Yalewayker Gashaw, Ermias Getachew, Muluken Gashaw, Ephrem Tamrat, Atitegeb Abera Kidie, Tadesse Misganaw, Agenagne Ashagre, Getinet Kumie, Sisay Ayana, Solomon Gedfie, Woldeteklehaymanot Kassahun, Mulat Awoke Kassa, Biruk Beletew Abate.

**Data curation:** Zelalem Asmare, Melese Abate Reta, Yalewayker Gashaw, Ermias Getachew, Assefa Sisay, Wagaw Abebe, Tadesse Misganaw, Zelalem Dejazmach, Marye Nigatie, Abdu Jemal, Solomon Gedfie, Selamyhun Tadesse, Biruk Beletew Abate.

**Formal analysis:** Zelalem Asmare, Melese Abate Reta, Yalewayker Gashaw, Ermias Getachew, Assefa Sisay, Wagaw Abebe, Agenagne Ashagre, Marye Nigatie, Mulat Awoke Kassa, Selamyhun Tadesse, Biruk Beletew Abate.

**Investigation:** Zelalem Asmare, Yalewayker Gashaw, Tadesse Misganaw, Solomon Gedfie.

**Methodology:** Zelalem Asmare, Melese Abate Reta, Ermias Getachew, Assefa Sisay, Muluken Gashaw, Ephrem Tamrat, Atitegeb Abera Kidie, Wagaw Abebe, Tadesse Misganaw,



Agenagnew Ashagre, Getinet Kumie, Marye Nigatie, Sisay Ayana, Abdu Jemal, Woldeteklehaymanot Kassahun, Biruk Beletew Abate.

**Software:** Zelalem Asmare, Melese Abate Reta, Yalewayker Gashaw, Ephrem Tamrat, Atitegeb Abera Kidie, Agenagnew Ashagre, Sisay Ayana, Abdu Jemal, Solomon Gedfie, Woldeteklehaymanot Kassahun, Biruk Beletew Abate.

**Supervision:** Zelalem Asmare, Melese Abate Reta, Ermias Getachew, Ephrem Tamrat, Atitegeb Abera Kidie, Wagaw Abebe, Sisay Ayana, Biruk Beletew Abate.

**Validation:** Zelalem Asmare, Melese Abate Reta, Yalewayker Gashaw, Zelalem Dejzasmach, Marye Nigatie, Mulat Awoke Kassa, Selamyhun Tadesse, Biruk Beletew Abate.

**Visualization:** Zelalem Asmare, Melese Abate Reta, Zelalem Dejzasmach, Marye Nigatie, Mulat Awoke Kassa, Selamyhun Tadesse.

**Writing – original draft:** Zelalem Asmare, Melese Abate Reta, Yalewayker Gashaw, Assefa Sisay, Ephrem Tamrat, Wagaw Abebe, Getinet Kumie, Solomon Gedfie.

**Writing – review & editing:** Zelalem Asmare, Melese Abate Reta, Yalewayker Gashaw, Ermias Getachew, Assefa Sisay, Muluken Gashaw, Ephrem Tamrat, Atitegeb Abera Kidie, Wagaw Abebe, Tadesse Misganaw, Agenagnew Ashagre, Zelalem Dejzasmach, Getinet Kumie, Marye Nigatie, Sisay Ayana, Abdu Jemal, Solomon Gedfie, Woldeteklehaymanot Kassahun, Mulat Awoke Kassa, Selamyhun Tadesse, Biruk Beletew Abate.

## References

1. Paitoonpong L, Wong CKB, Perl TM. Healthcare-associated infections. *Infectious disease epidemiology theory and practice*. 2013;369–466.
2. Remold S.K, Brown C.K, Farris J.E, Hundley T.C, Perpich J.A, Purdy M.A. Differential habitat use and niche partitioning by *Pseudomonas* species in human homes. *Microb Ecol*. 2011; 62:505–17.
3. Qin Shugang, Xiao Wen, Zhou Chuanmin, Pu Qinqin, Deng Xin, Lan Lefu, et al. *Pseudomonas aeruginosa*: pathogenesis, virulence factors, antibiotic resistance, interaction with host, technology advances and emerging therapeutics. *Signal Transduction and Targeted Therapy*. 2022; 7(199).
4. Murray CJ, Ikuta KS, Sharara F, Swetschinski L, Aguilar GR, Gray A, et al. Global burden of bacterial antimicrobial resistance in 2019: a systematic analysis. *The Lancet*. 2022; 399(10325):629–55.
5. Sartorius B, Gray AP, Weaver ND, Aguilar GR, Swetschinski LR, Ikuta KS, et al. The burden of bacterial antimicrobial resistance in the WHO African region in 2019: a cross-country systematic analysis. *The Lancet Global Health*. 2024; 12(2):e201–e16. [https://doi.org/10.1016/S2214-109X\(23\)00539-9](https://doi.org/10.1016/S2214-109X(23)00539-9) PMID: 38134946
6. World\_Bank. Drug-Resistant Infections: A Threat to Our Economic Future. Washington, DC: World Bank; 2017.
7. WHO. Global action plan on antimicrobial resistance. 2015.
8. WHO. Antimicrobial resistance. 2023.
9. WHO. Global priority list of antibiotic-resistant bacteria. 2017.
10. Breidenstein E.B., de la Fuente-Nunez C, Hancock R.E. *Pseudomonas aeruginosa*: all roads lead to resistance. *Trends Microbiol*. 2011; 19:419–26.
11. Bekele T, Tesfaye A, Sewunet T, Waktola HD. *Pseudomonas aeruginosa* isolates and their antimicrobial susceptibility pattern among catheterized patients at Jimma University Teaching Hospital, Jimma, Ethiopia. *BMC Res Notes*. 2015; 8(1):1–4. <https://doi.org/10.1186/s13104-015-1497-x> PMID: 26416559
12. Dessie W, Mulugeta G, Fentaw S, Mihret A, Hassen M, Abebe E. Pattern of bacterial pathogens and their susceptibility isolated from surgical site infections at selected referral hospitals, Addis Ababa, Ethiopia. *International journal of microbiology*. 2016; 2016. <https://doi.org/10.1155/2016/2418902> PMID: 27446213
13. Gashaw M, Berhane M, Bekele S, Kibru G, Teshager L, Yilma Y, et al. Emergence of high drug resistant bacterial isolates from patients with health care associated infections at Jimma University medical

- center: a cross sectional study. *Antimicrobial Resistance & Infection Control*. 2018; 7:1–8. <https://doi.org/10.1186/s13756-018-0431-0> PMID: 30479751
14. Melaku TM, Yimer RM, Abdinasir MM, Alemu MK. Antibiotics Resistance Pattern of Aerobic Bacteria Causing Surgical Site Wound Infection and its Associated Factors in Public Hospital, Dire Dawa-Eastern Ethiopia. *International Journal of Clinical Infectious Diseases*. 2023; 2(3).
  15. Motbainor H, Bereded F, Mulu W. Multi-drug resistance of blood stream, urinary tract and surgical site nosocomial infections of *Acinetobacter baumannii* and *Pseudomonas aeruginosa* among patients hospitalized at Felegehiwot referral hospital, Northwest Ethiopia: a cross-sectional study. *BMC infectious diseases*. 2020; 20:1–11.
  16. Page MJ, McKenzie JE, Bossuyt PM, Boutron I, Hoffmann TC, Mulrow CD, et al. The PRISMA 2020 statement: an updated guideline for reporting systematic reviews. *BMJ (Clinical research ed)*. 2021; 372:n71. <https://doi.org/10.1136/bmj.n71> PMID: 33782057
  17. Munn Z, Moola S, Lis K, Riitano D, C T. Systematic reviews of prevalence and incidence. In: Aromataris E Z. M, editors. *JBI Manual for Evidence Synthesis*: JBI; 2020.
  18. Borenstein M, Cooper H, Hedges L, Valentine J. Heterogeneity in meta-analysis. *The handbook of research synthesis and meta-analysis*. 2019; 3:453–70.
  19. Sweeting M J., Sutton A J., Lambert P C. What to add to nothing? Use and avoidance of continuity corrections in meta-analysis of sparse data. *Statistics in medicine*. 2004; 23(9):1351–75. <https://doi.org/10.1002/sim.1761> PMID: 15116347
  20. Magiorakos A-P, Srinivasan A, Carey RB, Carmeli Y, Falagas M, Giske C, et al. Multidrug-resistant, extensively drug-resistant and pandrug-resistant bacteria: an international expert proposal for interim standard definitions for acquired resistance. *Clin Microbiol Infect*. 2012; 18(3):268–81. <https://doi.org/10.1111/j.1469-0691.2011.03570.x> PMID: 21793988
  21. Abayneh M, Asnake M, Muleta D, Simienseh A. Assessment of Bacterial Profiles and Antimicrobial Susceptibility Pattern of Isolates Among Patients Diagnosed with Surgical Site Infections at Mizan-Tepi University Teaching Hospital, Southwest Ethiopia: A Prospective Observational Cohort Study. *Infection and Drug Resistance*. 2022; 15:1807–19. <https://doi.org/10.2147/IDR.S357704> PMID: 35444431
  22. Abosse S, Genet C, Derbie A. Antimicrobial Resistance Profile of Bacterial Isolates Identified from Surgical Site Infections at a Referral Hospital, Northwest Ethiopia. *Ethiopian Journal of Health Sciences*. 2021; 31(3).
  23. Adugna B, Sharew B, Jemal M. Bacterial profile, antimicrobial susceptibility pattern, and associated factors of community-and hospital-acquired urinary tract infection at Dessie Referral Hospital, Dessie, Northeast Ethiopia. *International journal of microbiology*. 2021; 2021:1–14. <https://doi.org/10.1155/2021/5553356> PMID: 34589128
  24. Alemayehu T, Tadesse E, Ayalew S, Nigusse B, Yeshitila B, Amsalu A, et al. High burden of Nosocomial infections caused by multi-drug Re-sistant pathogens in pediatric patients at Hawassa university comprehensive specialized hospital. *Ethiopian Medical Journal*. 2019; 58.
  25. Lakoh S, Yi L, Russell L JB, Zhang J, Sevalie S, Yongkun Z, et al. High incidence of catheter-associated urinary tract infections and related antibiotic resistance in two hospitals of different geographic regions of Sierra Leone: a prospective cohort study. 2023.
  26. Asmare Z, Awoke T, Genet C, Admas A, Melese A, Mulu W. Incidence of catheter-associated urinary tract infections by Gram-negative bacilli and their ESBL and carbapenemase production in specialized hospitals of Bahir Dar, northwest Ethiopia. *Antimicrobial Resistance & Infection Control*. 2024; 13(1):1–12. <https://doi.org/10.1186/s13756-024-01368-7> PMID: 38273339
  27. Asres G, Legese M, Woldearegay G. Prevalence of multidrug resistant Bacteria in postoperative wound infections at Tikur Anbessa specialized hospital, Addis Ababa, Ethiopia. *Arch Med*. 2017; 9(4):12.
  28. Awoke Netsanet, Kassa Tesfaye, Teshager L. Magnitude of surgical site infection and its associated factors among patients who underwent a surgical procedure at Wolaita Sodo University Teaching and Referral Hospital, South Ethiopia. *PLoS One*. 2019; 14(12):1–9. <https://doi.org/10.1371/journal.pone.0226140> PMID: 31805161
  29. Bizuayehu H, Bitew A, Abdeta A, Ebrahim S. Catheter-associated urinary tract infections in adult intensive care units at a selected tertiary hospital, Addis Ababa, Ethiopia. *Plos one*. 2022; 17(3):e0265102. <https://doi.org/10.1371/journal.pone.0265102> PMID: 35316286
  30. Alelign Dagninet, Tena Teshome, Tadesse Dagimawie, Tessema Moges, Seid Mohamed, Oumer Yisiak, et al. Bacteriological Profiles, Antimicrobial Susceptibility Patterns, and Associated Factors in Patients Undergoing Orthopedic Surgery with Suspicion of Surgical Site Infection at Arba Minch General Hospital in Southern Ethiopia. *Int J Microbiol*. 2022; 15:2427–43. <https://doi.org/10.2147/IDR.S367510> PMID: 35592104

31. Gebissa T, Bude B, Yasir M, Mekit S, Noorulla K. Bacterial isolates and their antibiotic sensitivity pattern of surgical site infections among the surgical ward patients of Asella Referral and Teaching Hospital. *Future Journal of Pharmaceutical Sciences*. 2021; 7(1):100.
32. Mekonnen H, Seid A, Molla Fenta G, Gebrecherkos T. Antimicrobial resistance profiles and associated factors of *Acinetobacter* and *Pseudomonas aeruginosa* nosocomial infection among patients admitted at Dessie comprehensive specialized Hospital, North-East Ethiopia. A cross-sectional study. *PLoS One*. 2021; 16(11):e0257272.
33. Misha G, Chelkeba L, Melaku T. Bacterial profile and antimicrobial susceptibility patterns of isolates among patients diagnosed with surgical site infection at a tertiary teaching hospital in Ethiopia: a prospective cohort study. *Annals of Clinical Microbiology and Antimicrobials*. 2021; 20:1–10.
34. Sahile T, Esseye S, Beyene G, Ali S. Post-surgical infection and antibiotic susceptibility patterns of bacteria isolated from admitted patients with signs of infection at Jimma University specialized hospital, Jimma, Ethiopia. *International Journal of TROPICAL DISEASE & Health*. 2016; 17(4):1–12.
35. Tilahun M. Multi-Drug Resistance Profile, Prevalence of Extended-Spectrum Beta-Lactamase and Carbapenemase-Producing Gram Negative Bacilli Among Admitted Patients After Surgery with Suspected of Surgical Site Nosocomial Infection North East Ethiopia. *Infection and Drug Resistance*. 2022; 15:3949–65. <https://doi.org/10.2147/IDR.S376622> PMID: 35924020
36. Tilahun M, Gedefie A, Bisetegn H, Debash H. Emergence of high prevalence of extended-spectrum beta-lactamase and carbapenemase producing *Acinetobacter* species and *pseudomonas aeruginosa* among hospitalized patients at Dessie comprehensive specialized Hospital, North-East Ethiopia. *Infection and Drug Resistance*. 2022; 15:895–911.
37. Tolera M, Abate D, Dheresa M, Marami D. Bacterial Nosocomial Infections and Antimicrobial Susceptibility Pattern among Patients Admitted at Hiwot Fana Specialized University Hospital, Eastern Ethiopia. *Advances in Medicine*. 2018; 2018. <https://doi.org/10.1155/2018/2127814> PMID: 30631777
38. Worku S, Abebe T, Alemu A, Seyoum B, Swedberg G, Abdissa A, et al. Bacterial profile of surgical site infection and antimicrobial resistance patterns in Ethiopia: a multicentre prospective cross-sectional study. *Annals of Clinical Microbiology and Antimicrobials*. 2023; 22(1):96. <https://doi.org/10.1186/s12941-023-00643-6> PMID: 37936207
39. Wang J, Liu F, Tartari E, Huang J, Harbarth S, Pittet D, et al. The prevalence of healthcare-associated infections in mainland China: a systematic review and meta-analysis. *infection control & hospital epidemiology*. 2018; 39(6):701–9.
40. Mahmoud AB, Zahran WA, Hindawi GR, Labib AZ, Galal R. Prevalence of multidrug-resistant *Pseudomonas aeruginosa* in patients with nosocomial infections at a university hospital in Egypt, with special reference to typing methods. *J Virol Microbiol*. 2013; 13:165–59.
41. Acar A, Karaahmetoğlu G, Akalin H, Altay AF. Pooled prevalence and trends of antimicrobial resistance in *Pseudomonas aeruginosa* clinical isolates over the past 10 years in Turkey: A meta-analysis. *Journal of Global Antimicrobial Resistance*. 2019; 18:64–70. <https://doi.org/10.1016/j.jgar.2019.01.032> PMID: 30753904
42. Yang Y, Zhang L, Wang J, Chen Z, Tong L, Wang Z, et al., editors. Proportions of *Pseudomonas aeruginosa* and antimicrobial-resistant *Pseudomonas aeruginosa* among Patients with Surgical Site Infections in China: A Systematic Review and Meta-Analysis. *Open Forum Infectious Diseases*; 2023: Oxford University Press.
43. Ding C, Yang Z, Wang J, Liu X, Cao Y, Pan Y, et al. Prevalence of *Pseudomonas aeruginosa* and antimicrobial-resistant *Pseudomonas aeruginosa* in patients with pneumonia in mainland China: a systematic review and meta-analysis. *International Journal of Infectious Diseases*. 2016; 49:119–28. <https://doi.org/10.1016/j.ijid.2016.06.014> PMID: 27329135
44. Mohamed AH, Sheikh Omar NM, Osman MM, Mohamud HA, Eraslan A, Gur M. Antimicrobial resistance and predisposing factors associated with catheter-associated UTI caused by uropathogens exhibiting multidrug-resistant patterns: a 3-year retrospective study at a tertiary Hospital in Mogadishu, Somalia. *Tropical Medicine Infectious Diseases*. 2022; 7(3):42.
45. Gill J, Arora S, Khanna S, Kumar KH. Prevalence of multidrug-resistant, extensively drug-resistant, and pandrug-resistant *Pseudomonas aeruginosa* from a tertiary level intensive care unit. *Journal of global infectious diseases*. 2016; 8(4):155. <https://doi.org/10.4103/0974-777X.192962> PMID: 27942195
46. Parajuli NP, Acharya SP, Mishra SK, Parajuli K, Rijal BP, Pokhrel BM. High burden of antimicrobial resistance among gram negative bacteria causing healthcare associated infections in a critical care unit of Nepal. *Antimicrobial Resistance & Infection Control*. 2017; 6(1):1–9.
47. Prestinaci F, Pezzotti P, Pantosti A. Antimicrobial resistance: a global multifaceted phenomenon. *Pathogens and global health*. 2015; 109(7):309–18. <https://doi.org/10.1179/2047773215Y.0000000030> PMID: 26343252

48. Sulis G, Sayood S, Gandra S. Antimicrobial resistance in low-and middle-income countries: current status and future directions. *Expert review of anti-infective therapy*. 2022; 20(2):147–60. <https://doi.org/10.1080/14787210.2021.1951705> PMID: 34225545
49. Vaez H, Salehi-Abargouei A, Ghalehnoo ZR, Khademi F. Multidrug resistant *Pseudomonas aeruginosa* in Iran: A systematic review and metaanalysis. *Journal of global infectious diseases*. 2018; 10(4):212. [https://doi.org/10.4103/jgid.jgid\\_113\\_17](https://doi.org/10.4103/jgid.jgid_113_17) PMID: 30581263
50. Masoudifar M, Gouya MM, Pezeshki Z, Eshrati B, Afhami S, Farzami MR, et al. Health care-associated infections, including device-associated infections, and antimicrobial resistance in Iran: The national update for 2018. *Journal of Preventive Medicine and Hygiene*. 2021; 62(4):E943. <https://doi.org/10.15167/2421-4248/jpmh2021.62.4.1801> PMID: 35603257
51. del Barrio-Tofiño E, Zamorano L, Cortes-Lara S, López-Causapé C, Sánchez-Diener I, Cabot G, et al. Spanish nationwide survey on *Pseudomonas aeruginosa* antimicrobial resistance mechanisms and epidemiology. *Journal of Antimicrobial Chemotherapy*. 2019; 74(7):1825–35. <https://doi.org/10.1093/jac/dkz147> PMID: 30989186
52. Chen Q, Li D, Beiersmann C, Neuhann F, Moazen B, Lu G, et al. Risk factors for antibiotic resistance development in healthcare settings in China: a systematic review. *Epidemiology & Infection*. 2021; 149.
53. Raman G, Avendano EE, Chan J, Merchant S, Puzniak L. Risk factors for hospitalized patients with resistant or multidrug-resistant *Pseudomonas aeruginosa* infections: a systematic review and meta-analysis. *Antimicrobial Resistance & Infection Control*. 2018; 7:1–14. <https://doi.org/10.1186/s13756-018-0370-9> PMID: 29997889
